# Supplementary material for: Amyloid β42 peptide is toxic to non-neural cells inDrosophilayielding a characteristic metabolite profile and the effect can be suppressed by PI3K
Source: Oxford University Press journal article supplement (doi:10.1242/bio.029991), 2017-11-15
Supplement: bio029991supp.pdf [file bio029991supp.pdf]

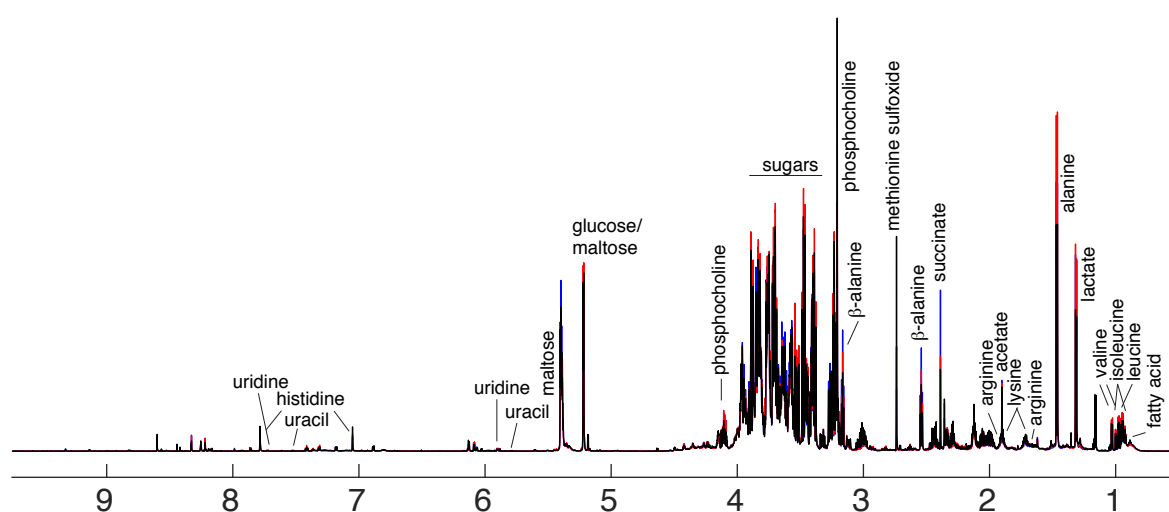

**Fig. S1.-  $^1\text{H}$  nuclear magnetic resonance (NMR) spectra of *Drosophila melanogaster* metabolites.** NMR spectra of flies expressing PI3K (blue), A $\beta$ 42 (red) and both A $\beta$ 42 and PI3K (black) 15 days after induction of protein expression. The displayed spectra show the mean intensities of three replicates.

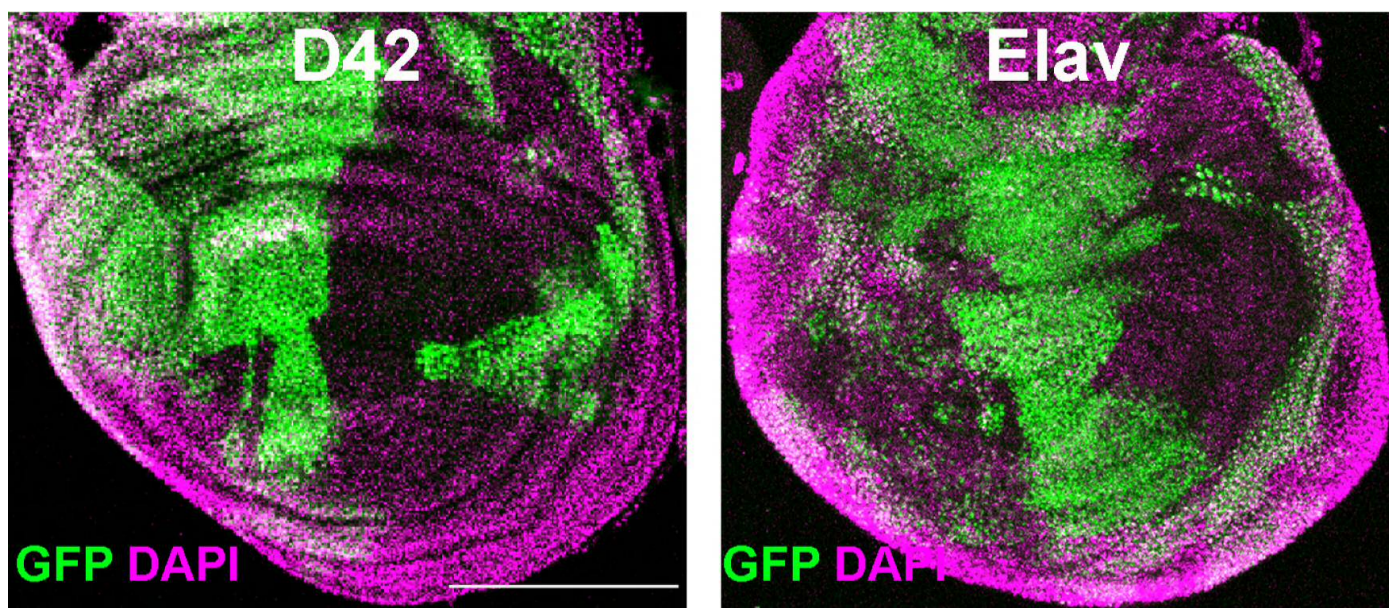

## Suppl Fig. S2

**Fig. S2.- Transient activation of Gal4 drivers in the wing disc.** Using the G-TRACE technique, the initial activation of enhancers controlling the Gal4 expression can be monitored by GFP. Once activated, the GFP reporter maintains its expression in a Gal4 independent manner allowing its visualization even when the enhancer controlling the Gal4 expression is switched off. The images shown correspond to late third instar larva, a time at which the *D42* and *elav-Gal4* drivers are no longer expressed in the wing disc.

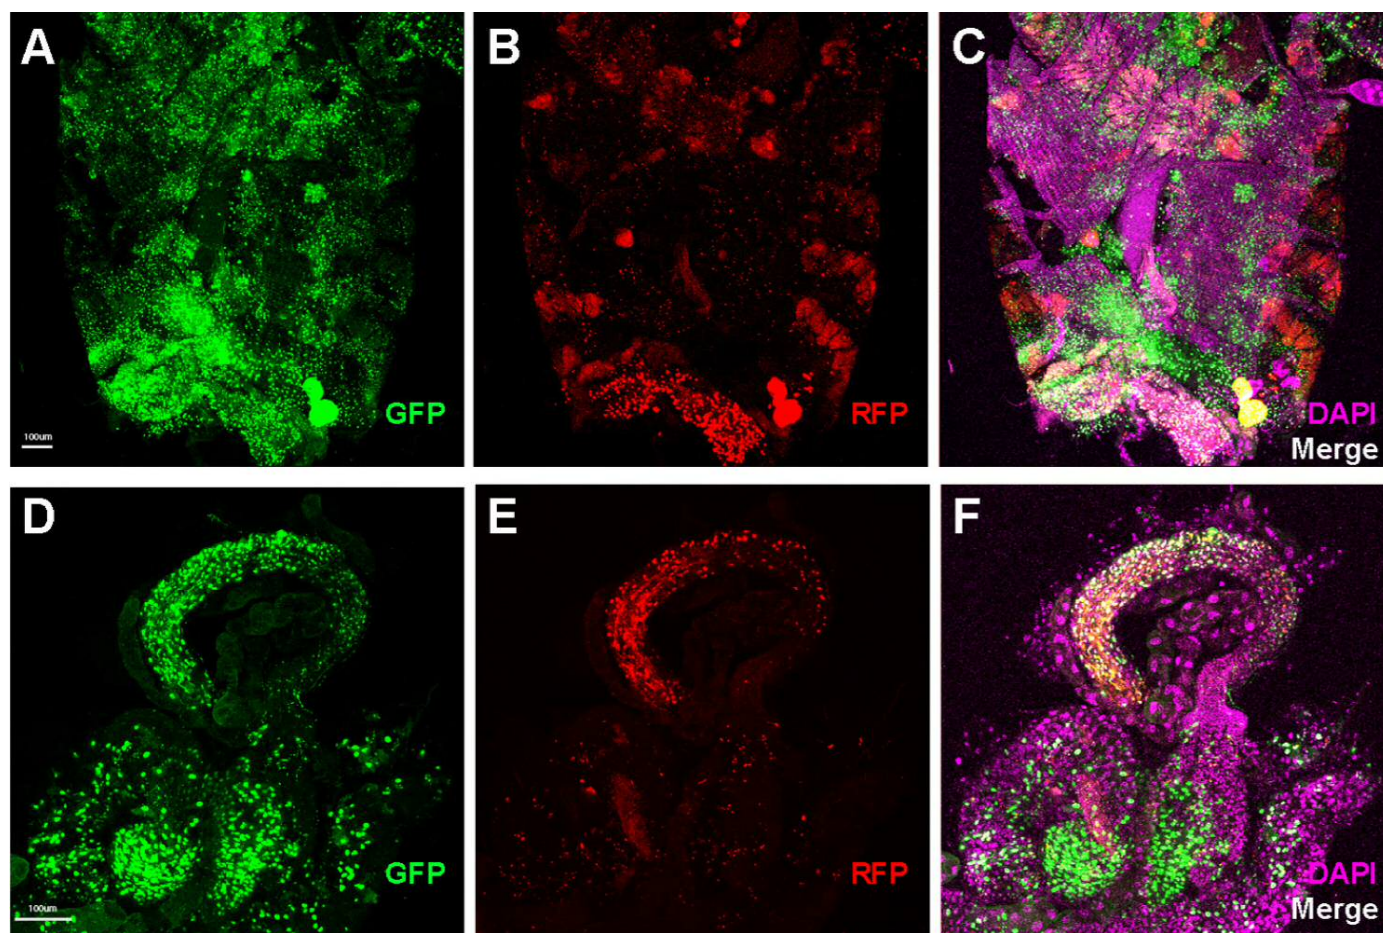

## Supp. Fig. S3

**Fig. S3.- Transient activation of *elav-Gal4* in the adult.** Images show a squashed adult female abdomen (A-C) and thorax (D-F) 15-days post switching-on the driver. Genotype: *elav-Gal4/+* ; *UAS-RedStinger*, *UAS-FLP*, *Ubip63FRT-stop-FRT-Stinger/+* ; *tub-Gal80<sup>TS</sup>/+*. The historical (green) versus the current (red) expression domains of the driver are revealed. All these cells contributed to the metabolic signature of Aβ42.



**Table S1.****O2PLS-DA and OPLS-DA model statistics for parameter prediction from metabolite data**

| <b>Modeled groups</b>                           | <b>Age (days)</b> | <b>A<sup>†</sup></b> | <b>N<sup>‡</sup></b> | <b>R<sup>2§</sup></b> | <b>Q<sup>2*</sup></b> |
|-------------------------------------------------|-------------------|----------------------|----------------------|-----------------------|-----------------------|
| control <i>vs.</i> A $\beta$ 42 <i>vs.</i> PI3K | 7, 15             | 2+0                  | 18                   | 0.40                  | <b>0.41</b>           |
| A $\beta$ 42 <i>vs.</i> control and PI3K        | 7, 15             | 1+1                  | 18                   | 0.42                  | <b>0.76</b>           |
|                                                 | 7                 | 1+0                  | 9                    | 0.46                  | <b>0.81</b>           |
|                                                 | 15                | 1+0                  | 9                    | 0.39                  | <b>0.70</b>           |
| PI3K <i>vs.</i> control and A $\beta$ 42        | 7, 15             | 1+1                  | 18                   | 0.42                  | <b>0.64</b>           |
| A $\beta$ 42+PI3K <i>vs.</i> control and PI3K   | 7, 15             | 1+1                  | 18                   | 0.52                  | <b>-0.11</b>          |

<sup>†</sup>A describes the number of model components where the first number accounts for the predictive component(s) correlating with the predicted variable, and the second the orthogonal component(s).

<sup>‡</sup>N describes the number of observations included in the model.

<sup>§</sup>R<sup>2</sup> describes how much of the total metabolite variation that is explained by the model.

\*Q<sup>2</sup> represents the predictability of the total model and is related to the statistical validity of the model. Q<sup>2</sup> was calculated using cross-validation with all measurements for one condition left out at a time.
